# Supplementary material for: Deregulated microRNAs Are Associated with Patient Survival and Predicted to Target Genes That Modulate Lung Cancer Signaling Pathways
Source: Cancers (Basel). 2020 Sep 22;12(9):2711. doi: 10.3390/cancers12092711 (PMC7563870; doi:10.3390/cancers12092711)
Supplement: Supplementary file 1 [file cancers-12-02711-s001.xlsx]

## Sheet: Table S1
	Term	Overlap (number of identified genes per total njumber of genes in the pathway)	P-value	Adjusted P-value	Odds Ratio	Combined Score	Genes
WikiPathways	EGF/EGFR Signaling Pathway WP437	21/162	2.17848e-11	1.02824e-08	6.27746	154.111	MAP3K2;ERRFI1;RALA;IQSEC1;STXBP1;NCOA3;STAT3;INPPL1;GAB1;PIK3R1;CRKL;ELK4;ITCH;RPS6KA5;CREB1;MAPK7;SYNJ1;RASA1;E2F1;MAPK1;JAK1
WikiPathways	Pancreatic adenocarcinoma pathway WP4263	14/89	3.84624e-09	9.07713e-07	7.6176	147.6	RALA;STAT3;PIK3R1;TGFBR1;TGFBR2;VEGFA;CDK6;CCND1;AKT3;E2F1;E2F2;MAPK1;E2F3;JAK1
WikiPathways	Integrated Breast Cancer Pathway WP1984	17/151	1.57999e-08	2.48585e-06	5.45195	97.9348	RALA;BMPR2;NCOA3;HMGCR;BACH1;ESR1;TGFBR1;SMAD7;TGFBR2;VEGFA;WEE1;CREB1;CCND1;CHEK1;E2F1;MAPK1;JAK1
WikiPathways	Leptin signaling pathway WP2034	Twelve out of 76 genes	4.82687e-08	5.69571e-06	7.64623	128.812	PRKAA1;CREB1;CCND1;ROCK2;CFL2;STAT3;REL;MAPK1;KPNA4;PIK3R1;ESR1;JAK1
WikiPathways	TGF-beta Signaling Pathway WP366	15/132	9.81356e-08	9.264e-06	5.50297	88.801	YAP1;PIK3R1;THBS1;RUNX2;TGFBR1;SMAD7;TGFBR2;TGFBR3;ITCH;ZEB1;CCND1;PRKAR2A;MAPK1;SIK1;MET
WikiPathways	Signaling Pathways in Glioblastoma WP2261	Twelve of 82	1.15299e-07	9.07017e-06	7.08675	113.216	ERRFI1;CCND2;CDK6;CCND1;AKT3;GAB1;E2F1;MAPK1;MDM4;PIK3R1;MET;IGF1R
WikiPathways	Viral Acute Myocarditis WP4298	Twelve of 84	1.51511e-07	1.02162e-05	6.91802	108.631	CREB1;SOCS1;CCND1;LAMA2;RASA1;STAT3;ABL2;BNIP2;MAPK1;PIK3R1;EIF4G2;JAK1
WikiPathways	Retinoblastoma Gene in Cancer WP2446	Twelve of 87	2.24933e-07	1.3271e-05	6.67947	102.246	NPAT;WEE1;RRM2;CDK6;CCND1;CCNE2;CHEK1;E2F1;CCDC6;E2F2;E2F3;SMC1A
WikiPathways	Hypothesized Pathways in Pathogenesis of Cardiovascular Disease WP3668	Seven of 25	5.30484e-07	2.78209e-05	13.5593	195.925	TGFBR3;MAPK1;NR2C2;TGFBR1;RUNX2;TGFBR2;FBN1
WikiPathways	TGF-beta Receptor Signaling WP560	Seven of 54	1.46e-06	6.9e-05	8.07103	108.437	TGFBR3;STAT3;THBS1;SMAD5;TGFBR1;RUNX2;JAK1;TGFBR2;SMAD7
Reactome	G1 Phase Homo sapiens R-HSA-69236	Seven of 38	1.1048e-05	0.0169035	8.92061	101.813	CCND2;CDK6;CCND1;E2F1;E2F2;PPP2R2A;E2F3
Reactome	Cyclin D associated events in G1 Homo sapiens R-HSA-69231	Seven of 38	1.1048e-05	0.00845174	8.92061	101.813	CCND2;CDK6;CCND1;E2F1;E2F2;PPP2R2A;E2F3
Reactome	NGF signalling via TRKA from the plasma membrane Homo sapiens R-HSA-187037	21/374	3.7074e-05	0.0189077	2.71912	27.742	PHLPP2;DUSP2;RALA;STAT3;GAB1;PIK3R1;DUSP8;CRKL;SPRED1;PSMD7;RPS6KA5;CREB1;MAPK7;FGF9;PRKAR2A;RASA1;AKT3;PIP4K2A;MAPK1;JAK1;TNRC6B
Reactome	Oncogene Induced Senescence Homo sapiens R-HSA-2559585	Six of 32	4.29821e-05	0.0164407	9.0799	91.2959	CDK6;E2F1;E2F2;MAPK1;E2F3;TNRC6B
Reactome	Signalling by NGF Homo sapiens R-HSA-166520	23/450	6.82762e-05	0.0208925	2.47511	23.7412	PHLPP2;RALA;DUSP2;STAT3;GAB1;PIK3R1;DUSP8;CRKL;SPRED1;PSMD7;BCL2L11;CREB1;RPS6KA5;MAPK7;FGF9;PRKAR2A;RASA1;ARHGDIA;AKT3;PIP4K2A;MAPK1;JAK1;TNRC6B
Reactome	Signaling by PDGF Homo sapiens R-HSA-186797	20/364	7.6297e-05	0.0194557	2.66078	25.2265	PHLPP2;DUSP2;STAT3;GAB1;PIK3R1;DUSP8;THBS1;CRKL;SPRED1;PSMD7;CREB1;FGF9;PRKAR2A;RASA1;AKT3;PIP4K2A;MAPK1;STAT6;JAK1;TNRC6B
Reactome	Cellular responses to stress Homo sapiens R-HSA-2262752	20/367	8.53493e-05	0.0186549	2.63903	24.7244	GABARAPL1;EGLN3;PRKAA1;MTMR3;STAT3;UBE2D3;ATG9A;HMGA1;PHC3;VEGFA;CDK6;MAPK7;CCNE2;E2F1;E2F2;MAPK1;E2F3;HIF1AN;VHL;TNRC6B
Reactome	Signaling by BMP Homo sapiens R-HSA-201451	Five of 23	9.07144e-05	0.0173491	10.5274	97.9871	BMPR2;UBE2D3;SMAD5;ACVR2A;SMAD7
Reactome	Downstream signal transduction Homo sapiens R-HSA-186763	19/341	9.56245e-05	0.0162562	2.69823	24.9724	PHLPP2;DUSP2;STAT3;GAB1;PIK3R1;DUSP8;CRKL;SPRED1;PSMD7;CREB1;FGF9;PRKAR2A;RASA1;AKT3;PIP4K2A;MAPK1;STAT6;JAK1;TNRC6B
Reactome	Developmental Biology Homo sapiens R-HSA-1266738	33/786	9.78512e-05	0.0149712	2.03316	18.7702	ROCK2;PITPNA;NTN4;ACVR1B;MED17;SPRED1;PSMD7;RPS6KA5;FGF9;DPYSL2;AKT3;POLR2D;HOXA3;ABL2;BNIP2;MAPK1;PKNOX1;JAK1;CDK19;DUSP2;EPHA7;NCOA3;RDX;STAT3;DUSP8;RGMB;ACVR2A;VEGFA;NR6A1;CREB1;RASA1;PPARG;MET
GO MF	RNA polymerase II transcription regulatory region sequence-specific binding transcriptional activator activity (GO:0001228)	24/284	6.11365e-09	7.03681e-06	4.09235	77.3976	NFAT5;ONECUT2;STAT3;FOXJ3;HMGA1;RORA;MITF;VEZF1;ETV1;ARID3B;MEOX2;NR2C2;ESR1;ELK4;CREB1;NFIB;MTF1;IRF1;CREBRF;REL;E2F2;STAT6;E2F3;SOX4
GO MF	RNA polymerase II regulatory region sequence-specific DNA binding (GO:0000977)	31/460	8.86143e-09	5.09975e-06	3.2635	60.5104	NFAT5;ONECUT2;SATB1;RORA;MEOX2;NR2C2;BACH1;ELK4;PURB;PURA;MXI1;E2F2;STAT6;E2F3;POU2F1;STAT3;MITF;VEZF1;ETV1;ARID3B;ESR1;NR6A1;CREB1;NFIB;MTF1;IRF1;REL;CREBRF;PPARG;MXD1;CLOCK
GO MF	transcription regulatory region sequence-specific DNA binding (GO:0000976)	23/292	4.71324e-08	1.80831e-05	3.81439	64.3499	SATB1;HMGA1;RORA;VEZF1;ARID3B;NR2C2;ESR1;PURB;PER2;PURA;REST;CREB1;ZNF704;BAHD1;CRY2;MXI1;CREBRF;REL;E2F2;PPARG;STAT6;E2F3;SOX4
GO MF	transmembrane receptor protein serine/threonine kinase activity (GO:0004675)	Six of 14	1.95174e-07	5.61614e-05	20.7541	320.637	TGFBR3;BMPR2;ACVR1B;TGFBR1;ACVR2A;TGFBR2
GO MF	transcription regulatory region DNA binding (GO:0044212)	25/374	2.93535e-07	6.75718e-05	3.23704	48.6892	YAP1;ARID4B;RORA;ELK4;PURB;PURA;BAHD1;E2F1;E2F2;E2F3;SOX4;STAT3;MITF;ESR1;SMAD7;PER2;REST;ZEB1;CREB1;DMTF1;KANSL1;MTF1;CRY2;PPARG;CLOCK
GO MF	core promoter binding (GO:0001047)	Twelve of 97	7.5079e-07	0.000144027	5.99086	84.484	ELK4;REST;KANSL1;MTF1;E2F1;E2F2;RORA;PPARG;E2F3;CLOCK;ESR1;SOX4
GO MF	protein serine/threonine kinase activity (GO:0004674)	22/368	9.21115e-06	0.00151458	2.89504	33.5683	MAP3K2;CDK19;PRKAA1;CCNT2;ROCK2;ACVR1B;TGFBR1;ACVR2A;SRPK1;TGFBR2;RPS6KA5;CDK6;MAPK7;CCND1;TAOK1;CHEK1;AKT3;WNK3;AAK1;MAPK1;SIK1;MAP3K9
GO MF	RNA polymerase II core promoter proximal region sequence-specific binding transcriptional activator activity (GO:0001077)	14/175	1.71571e-05	0.00246847	3.87409	42.5108	NFAT5;ONECUT2;STAT3;MITF;ETV1;MEOX2;NR2C2;ESR1;ELK4;CREB1;NFIB;IRF1;MTF1;SOX4
GO MF	RNA polymerase II regulatory region DNA binding (GO:0001012)	15/201	1.97861e-05	0.00253043	3.61389	39.1404	SATB1;RORA;VEZF1;ARID3B;NR2C2;PURB;PURA;CREB1;MXI1;CREBRF;REL;E2F2;PPARG;STAT6;E2F3
GO MF	RNA polymerase II core promoter proximal region sequence-specific binding transcription factor activity (GO:0000982)	18/280	2.30227e-05	0.00264992	3.11311	33.245	NFAT5;ONECUT2;STAT3;MITF;ETV1;MEOX2;NR2C2;BACH1;ESR1;ELK4;REST;CREB1;NFIB;MTF1;IRF1;MXD1;CLOCK;SOX4
GO CC	nuclear transcription factor complex (GO:0044798)	Nine of 71	1.50316e-05	0.0067041	6.13853	68.1705	NFAT5;POU2F1;MXI1;STAT3;HMGA1;E2F2;RORA;PPARG;E2F3
GO CC	RNA polymerase II transcription factor complex (GO:0090575)	12/147	5.59209e-05	0.0124704	3.95316	38.7076	YAP1;POU2F1;CREB1;MXI1;STAT3;HMGA1;E2F1;E2F2;RORA;PPARG;E2F3;MED17
GO CC	chromatin (GO:0000785)	17/296	0.00015413	0.0229141	2.78123	24.4128	NCOA3;USP3;STAT3;ESR1;RUNX2;CHAF1A;SLX4;CCND2;NASP;IRF1;BAHD1;CHEK1;E2F1;SMARCAD1;DVL3;POLR3G;MXD1
GO CC	nuclear chromatin (GO:0000790)	15/253	0.000264727	0.0295171	2.87112	23.6488	CBX5;NCOA3;USP3;STAT3;ESR1;RUNX2;CHAF1A;SLX4;CREB1;NASP;IRF1;E2F1;DVL3;POLR3G;MXD1
GO CC	nuclear chromosome part (GO:0044454)	19/392	0.000554938	0.0495005	2.34719	17.596	CBX5;USP3;NCOA3;STAT3;ESR1;RUNX2;PURA;HMBOX1;CHAF1A;SLX4;NASP;TNKS2;IRF1;E2F1;SMARCAD1;DVL3;POLR3G;NABP1;MXD1
GO CC	centrosome (GO:0005813)	20/461	0.00155775	0.115793	2.10092	13.5814	PATJ;ROCK2;KIF23;HOOK3;CCSAP;BICD2;MIB1;SMAD7;ZFYVE26;NIN;CDK6;TNKS2;PRKAR2A;CHEK1;CAPRIN2;E2F1;CEP97;SSX2IP;PAFAH1B1;NDEL1
GO CC	cytoplasmic ribonucleoprotein granule (GO:0036464)	10/170	0.00287575	0.183226	2.8486	16.6684	DDX6;SOCS1;PAN3;NUFIP2;ROCK2;USP3;POLR2D;IGF2BP1;CLOCK;PNRC1
GO CC	pericentriolar material (GO:0000242)	Three of 16	0.00400765	0.223427	9.0799	50.117	NIN;TNKS2;HOOK3
GO CC	platelet alpha granule membrane (GO:0031092)	Three of 17	0.00479261	0.2375	8.54579	45.6403	TMX3;PHACTR2;LHFPL2
GO CC	messenger ribonucleoprotein complex (GO:1990124)	Two of 7	0.00834004	0.371966	13.836	66.2288	CPEB2;CPEB4
GO BP	regulation of transcription from RNA polymerase II promoter (GO:0006357)	71/1478	1.72374e-11	8.79627e-08	2.32629	57.6546	CCNT2;BMPR2;ONECUT2;UBE2D3;RORA;ARID4B;MEOX2;BACH1;MED17;IRF2BPL;ELK4;RPS6KA5;CCND1;SOX4;NCOA3;TET1;MITF;VEZF1;ETV1;RGMB;RUNX2;TGFBR3;ZEB1;CREB1;DMTF1;MTF1;IRF1;TET3;CRY2;PPARG;MET;CLOCK;YAP1;NFAT5;SATB1;SATB2;XIAP;FOXK1;PIK3R1;NR2C2;HMBOX1;MAPK7;ZNF704;MXI1;E2F1;E2F2;STAT6;E2F3;VHL;FNIP1;ZBTB18;POU2F1;CBX5;STAT3;FOXJ3;HMGA1;SMAD5;ESR1;ACVR2A;VEGFA;SMAD7;TADA2B;PER2;REST;NR6A1;NFIB;CAPRIN2;REL;CR…
GO BP	DNA-templated positive regulation of transcription (GO:0045893)	59/1120	3.2127e-11	8.19722e-08	2.55102	61.636	CCNT2;BMPR2;ONECUT2;RORA;MEOX2;MED17;IRF2BPL;ELK4;RPS6KA5;CHEK1;SMARCAD1;SOX4;NCOA3;TET1;MITF;VEZF1;ETV1;RGMB;RUNX2;TGFBR1;CREB1;MTF1;IRF1;TET3;PPARG;MAPRE3;UBE2V1;MET;CLOCK;YAP1;NFAT5;PIK3R1;NR2C2;NPAT;SERTAD3;MAPK7;TP53INP1;E2F1;DVL3;E2F2;STAT6;E2F3;VHL;ZBTB18;MAP3K2;POU2F1;STAT3;FOXJ3;HMGA1;SMAD5;ESR1;ACVR2A;VEGFA;SMAD7;REST;NFIB;CAPRIN2;REL;CREBRF
GO BP	positive regulation of transcription from RNA polymerase II promoter (GO:0045944)	46/848	2.38248e-09	4.05259e-06	2.62689	52.1572	YAP1;NFAT5;CCNT2;BMPR2;ONECUT2;RORA;PIK3R1;MEOX2;NR2C2;MED17;IRF2BPL;ELK4;RPS6KA5;MAPK7;E2F1;E2F2;STAT6;E2F3;SOX4;ZBTB18;POU2F1;NCOA3;STAT3;FOXJ3;HMGA1;TET1;MITF;VEZF1;ETV1;SMAD5;ESR1;RUNX2;ACVR2A;VEGFA;SMAD7;CREB1;NFIB;MTF1;IRF1;TET3;CAPRIN2;REL;CREBRF;PPARG;MET;CLOCK
GO BP	DNA-templated regulation of transcription (GO:0006355)	66/1598	4.37123e-08	5.5766e-05	2.00008	33.8926	ZBTB21;HMGB3;RORA;ARID4B;BACH1;MED17;ELK4;RPS6KA5;ZNF805;BCL7A;SMARCAD1;SOX4;USP3;NCOA3;MITF;VEZF1;ETV1;RGMB;RUNX2;TGFBR1;ZEB1;CREB1;DMTF1;MTF1;IRF1;CRY2;PPARG;MAPRE3;UBE2V1;CLOCK;YAP1;SATB1;SATB2;FOXK1;NR2C2;ACVR1B;NPAT;SBNO1;HMBOX1;SERTAD3;ATXN1;BAHD1;ZNF704;TP53INP1;E2F1;DVL3;STAT6;APBB2;VHL;ZBTB18;MAP3K2;POU2F1;CBX5;RRM2;STAT3;FOXJ3;HMGA1;SMAD5;ESR1;VEGFA;TADA2B;PER2;REST;NR6A1;POLR3G;LIMS1
GO BP	DNA-templated negative regulation of transcription (GO:0045892)	40/813	3.74843e-07	0.000382565	2.38259	35.2546	SATB1;UBE2D3;ZBTB21;BACH1;IRF2BPL;ELK4;HMBOX1;ATXN1;RPS6KA5;CCND1;BCL7A;BAHD1;MXI1;E2F1;VHL;FNIP1;ZBTB18;POU2F1;CBX5;STAT3;HMGA1;MITF;ESR1;RUNX2;VEGFA;SMAD7;PER2;REST;ZEB1;NR6A1;CREB1;NFIB;IRF1;CRY2;REL;PPARG;MDM4;MXD1;CLOCK;LIMS1
GO BP	positive regulation of gene expression (GO:0010628)	38/771	7.14418e-07	0.000607612	2.38676	33.777	YAP1;PRKAA1;ROCK2;FAM129A;RORA;PIK3R1;THBS1;MED17;NPAT;SERTAD3;TP53INP1;E2F1;SMARCAD1;DVL3;ITGB8;MAPK1;VHL;SOX4;MAP3K2;NCOA3;RDX;STAT3;HMGA1;MITF;RGMB;SMAD5;ESR1;RUNX2;TGFBR1;VEGFA;REST;CREB1;IRF1;PPARG;MAPRE3;UBE2V1;CLOCK;LIMS1
GO BP	G1/S transition of mitotic cell cycle (GO:0000082)	12/105	1.7719e-06	0.00129171	5.53442	73.2948	NPAT;PPP6C;WEE1;CDK6;RRM2;CCND1;CCNE2;NASP;E2F1;BCAT1;ACVR1B;BACH1
GO BP	positive regulation of nucleic acid-templated transcription (GO:1903508)	28/502	2.16655e-06	0.00138199	2.70106	35.2282	YAP1;RORA;MED17;NPAT;SERTAD3;TP53INP1;E2F1;SMARCAD1;DVL3;VHL;SOX4;MAP3K2;NCOA3;STAT3;HMGA1;MITF;RGMB;SMAD5;ESR1;RUNX2;TGFBR1;REST;CREB1;IRF1;PPARG;MAPRE3;UBE2V1;CLOCK
GO BP	ventricular septum morphogenesis (GO:0060412)	Six of 21	3.11947e-06	0.00176874	13.836	175.411	TGFBR3;BMPR2;TGFBR1;SOX4;SMAD7;TGFBR2
GO BP	protein phosphorylation (GO:0006468)	26/470	5.8192e-06	0.00296954	2.67889	32.2923	PRKAA1;PKDCC;ROCK2;ACVR1B;IGF1R;RPS6KA5;AKT3;CHEK1;ABL2;MAPK1;MAP3K9;CLSPN;JAK1;MAP3K2;CDK19;TGFBR1;SRPK1;SMAD7;TGFBR2;TGFBR3;CDK6;CREB1;TAOK1;WNK3;AAK1;SIK1
BioPlanet	EGF/EGFR signaling pathway	20/141	1.22909e-11	1.85593e-08	6.86896	172.563	MAP3K2;ERRFI1;RALA;IQSEC1;STXBP1;STAT3;INPPL1;GAB1;PIK3R1;CRKL;ELK4;ITCH;RPS6KA5;CREB1;MAPK7;SYNJ1;RASA1;E2F1;MAPK1;JAK1
BioPlanet	Pancreatic cancer	14/70	1.39063e-10	1.04993e-07	9.68523	219.817	RALA;STAT3;PIK3R1;TGFBR1;TGFBR2;VEGFA;CDK6;CCND1;AKT3;E2F1;E2F2;MAPK1;E2F3;JAK1
BioPlanet	TGF-beta signaling pathway	21/185	2.72971e-10	1.37395e-07	5.49702	121.054	YAP1;STAT3;XIAP;PPP2R2A;PIK3R1;NR2C2;SMAD5;THBS1;RUNX2;TGFBR1;SMAD7;TGFBR2;TGFBR3;ITCH;ZEB1;MAPK7;CCND1;PRKAR2A;MAPK1;SIK1;JAK1
BioPlanet	Pathways in cancer	27/325	9.83141e-10	3.71136e-07	4.0231	83.4401	RALA;LAMA2;XIAP;PIK3R1;CRKL;IGF1R;CCND1;FGF9;AKT3;E2F1;DVL3;E2F2;MAPK1;E2F3;VHL;JAK1;EGLN3;STAT3;MITF;TGFBR1;VEGFA;TGFBR2;CDK6;CCNE2;CCDC6;PPARG;MET
BioPlanet	Integrated breast cancer pathway	17/152	1.74575e-08	5.27216e-06	5.41608	96.7502	RALA;BMPR2;NCOA3;HMGCR;BACH1;ESR1;TGFBR1;SMAD7;TGFBR2;VEGFA;WEE1;CREB1;CCND1;CHEK1;E2F1;MAPK1;JAK1
BioPlanet	Melanoma	Twelve of 71	2.18622e-08	5.50199e-06	8.1847	144.366	CDK6;CCND1;FGF9;AKT3;E2F1;E2F2;MAPK1;MITF;E2F3;PIK3R1;MET;IGF1R
BioPlanet	Chronic myeloid leukemia	Eleven of 73	2.87479e-07	6.20133e-05	7.29709	109.91	CDK6;CCND1;AKT3;E2F1;E2F2;MAPK1;E2F3;PIK3R1;TGFBR1;CRKL;TGFBR2
BioPlanet	Leptin signaling pathway	Tem of 61	4.45712e-07	8.41281e-05	7.93871	116.093	CREB1;CCND1;CFL2;STAT3;REL;MAPK1;KPNA4;PIK3R1;ESR1;JAK1
BioPlanet	ALK1 pathway	Seven of 26	7.13088e-07	0.00011964	13.0378	184.533	BMPR2;MAPK1;SMAD5;ACVR2A;TGFBR1;SMAD7;TGFBR2
BioPlanet	TGF-beta signaling in development	Seven of 26	7.13088e-07	0.000107676	13.0378	184.533	BMPR2;ACVR1B;SMAD5;ACVR2A;TGFBR1;SMAD7;TGFBR2
KEGG	Pancreatic cancer	14/75	3.67327e-10	1.13137e-07	9.03955	196.382	RALA;STAT3;PIK3R1;TGFBR1;TGFBR2;VEGFA;CDK6;CCND1;AKT3;E2F1;E2F2;MAPK1;E2F3;JAK1
KEGG	Pathways in cancer	35/530	1.59546e-09	2.45701e-07	3.19795	64.7781	RALA;LAMA2;ROCK2;XIAP;PIK3R1;CRKL;IGF1R;BCL2L11;CCND2;RPS6KA5;FGF9;CCND1;AKT3;E2F1;DVL3;E2F2;MAPK1;STAT6;E2F3;VHL;JAK1;EGLN3;NCOA3;STAT3;MITF;ESR1;TGFBR1;VEGFA;TGFBR2;CDK6;CCNE2;CCDC6;PPARG;GNB5;MET
KEGG	MicroRNAs in cancer	25/299	3.64844e-09	3.74573e-07	4.04901	78.6681	BMPR2;THBS1;CRKL;RPS6KA5;CCND2;SOCS1;BCL2L11;MAPK7;CCND1;E2F1;IGF2BP1;E2F2;MAPK1;E2F3;SOX4;RDX;STAT3;KIF23;VEGFA;ZEB1;CDK6;CCNE2;MDM4;MET;RECK
KEGG	Melanoma	Twelve of 72	2.5751e-08	1.98283e-06	8.07103	141.039	CDK6;CCND1;FGF9;AKT3;E2F1;E2F2;MAPK1;MITF;E2F3;PIK3R1;MET;IGF1R
KEGG	Chronic myeloid leukemia	Eleven of 76	4.37711e-07	2.6963e-05	7.00905	102.624	CDK6;CCND1;AKT3;E2F1;E2F2;MAPK1;E2F3;PIK3R1;TGFBR1;CRKL;TGFBR2
KEGG	Signaling pathways regulating pluripotency of stem cells	14/139	1.15816e-06	5.94523e-05	4.87745	66.6683	BMPR2;PCGF3;STAT3;PIK3R1;ACVR1B;SMAD5;ACVR2A;IGF1R;REST;AKT3;SMARCAD1;DVL3;MAPK1;JAK1
KEGG	Bladder cancer	Eight of 41	1.62521e-06	7.15094e-05	9.449	125.954	RPS6KA5;CCND1;E2F1;E2F2;MAPK1;E2F3;THBS1;VEGFA
KEGG	p53 signaling pathway	Tem of 72	2.16545e-06	8.337e-05	6.72585	87.7245	CCND2;RRM2;CDK6;CCND1;SESN3;CCNE2;ZMAT3;CHEK1;MDM4;THBS1
KEGG	Circadian rhythm	Seven of 31	2.60747e-06	8.92333e-05	10.9349	140.592	PER2;PRKAA1;CREB1;CRY2;RORA;FBXL3;CLOCK
KEGG	Gastric cancer	14/149	2.66325e-06	8.20281e-05	4.55011	58.405	GAB1;PIK3R1;TGFBR1;TGFBR2;CCND1;FGF9;CCNE2;AKT3;E2F1;DVL3;E2F2;MAPK1;E2F3;MET
